# Supplementary material
Source: PubMed Central journal article supplement (PMC6176729)
Supplement: NIHMS989214-supplement-2.pdf [file NIHMS989214-supplement-2.pdf]

## Compound SMILES

- 1 O=C(NC(CN1C=NC=C1)C2=CC=C(Cl)C=C2Cl)C(C=C3)=CC=C3C4=NN=C(O4)C5=CC(F)=C(F)C=C5
- 2 O=C(NC(CN1C=NC=C1)C2=CC=C(Cl)C=C2Cl)C(C=C3)=CC=C3C4=NN=C(O4)C5=CC(F)=C(C(F)(F)F)
- 3 O=C(NC(CN1C=NC=C1)C2=CC=C(Cl)C=C2Cl)C(C=C3)=CC=C3C4=NN=C(O4)C5=C(F)C=C(OCC(F)F)
- 4 O=C(NC(CN1C=NC=C1)C2=CC=C(Cl)C=C2Cl)C(C=C3)=CC=C3C4=NN=C(O4)C5=CC(F)=CC(OCC(F)F)
- 5 O=C(NC(CN1C=NC=C1)C2=CC=C(Cl)C=C2Cl)C(C=C3)=CC=C3C4=NN=C(O4)C5=CC(Cl)=C(Cl)C=C
- 6 O=C(NC(CN1C=NC=C1)C2=CC=C(Cl)C=C2Cl)C(C=C3)=CC=C3C4=NN=C(O4)C5=CC=CC(Br)=C5
- 7 O=C(NC(CN1C=NC=C1)C2=CC=C(Cl)C=C2Cl)C(C=C3)=CC=C3C4=NN=C(O4)C5=CC=CC(N6CCOC)
- 8 O=C(NC(CN1C=NC=C1)C2=CC=C(Cl)C=C2Cl)C(C=C3)=CC=C3C4=NN=C(O4)C5=CC=C(N6CCOCC)
- 9 O=C(NC(CN1C=NC=C1)C2=CC=C(Cl)C=C2Cl)C(C=C3)=CC=C3C4=NN=C(O4)C5=CC=CC(C6=CC=C
- 10 O=C(NC(CN1C=NC=C1)C2=CC=C(Cl)C=C2Cl)C(C=C3)=CC=C3C4=NN=C(O4)C5=CC=C(C6=CC=CC
- 11 O=C(NC(CN1C=NC=C1)C2=CC=C(Cl)C=C2Cl)C(C=C3)=CC=C3C4=NN=C(O4)C5=CC(F)=CC(C6=CC
- 12 O=C(NC(CN1C=NC=C1)C2=CC=C(Cl)C=C2Cl)C(C=C3)=CC=C3C4=NN=C(O4)C5=C(F)C=C(C6=CC=C
- 13 O=C(NC(CN1C=NC=C1)C2=CC=C(Cl)C=C2Cl)C(C=C3)=CC=C3C4=NN=C(O4)C5=C(F)C=CC(C6=CC
- 14 O=C(NC(CN1C=NC=C1)C2=CC=C(Cl)C=C2Cl)C(C=C3)=CC=C3C4=NN=C(O4)C5=CC(Cl)=C(S(=O)(=O)C
- 15 O=C(NC(CN1C=NC=C1)C2=CC=C(Cl)C=C2Cl)C(C=C3)=CC=C3C4=NN=C(O4)C5=CC(F)=CC(C6=C

VNI

O=C(NC(CN1C=NC=C1)C2=CC=C(Cl)C=C2Cl)C(C=C3)=CC=C3C4=NN=C(O4)C5=CC=CC=C5

-)C=C5

(F)F)C=C5

:)(F)F)=C5

5

C6)=C5

6)C=C5

:C=N6)=C5

:N6)C=C5

:CC=N6)=C5

:CC=N6)C=C5

:CC=N6)=C5

C)=O)C=C5

F)C=NC=N6)=C5
